# Supplementary material
Source: Springer Nature journal article supplement (https://www.springermedizin.de/resource/supplementary/12885_2013_4773_MOESM4_ESM.pdf/9467196)

**A**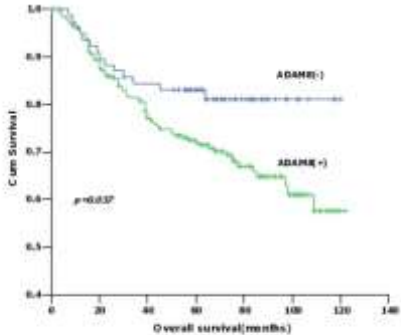**B**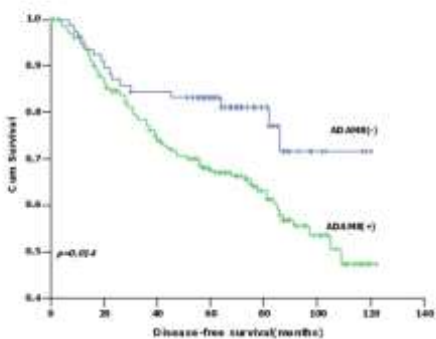

Supplement: MOESM4 [file 9467196]
